# Supplementary material for: Strengthening the non-pre-irradiated near-infrared mechanoluminescence of CaZnOS:Nd3+ by Mn2+ coactivation for biomechanical imaging
Source: Royal Society of Chemistry journal article supplement (doi:10.1039/d3tc00152k), 2023-01-01
Supplement: d3tc00152k1.pdf [file d3tc00152k1.pdf]

## Supplementary Information

### **Strengthening                      Non-Pre-Irradiated                      Near-Infrared Mechanoluminescence of CaZnOS:Nd<sup>3+</sup> by Mn<sup>2+</sup> coactivation for Biomechanical Imaging**

*Jianxiong Lei, Wei Li, Yiqian Tang, Yiyu Cai, Shanshan Wang,\* Kunpeng Dou, Jun-Cheng Zhang\**

College of Physics and Optoelectronic Engineering, Ocean University of China,  
Qingdao 266100, China

Email: wangshanshan@ouc.edu.cn (S. Wang); zhangjuncheng@ouc.edu.cn (J.-C. Zhang).

## *Table of Contents*

### Supplementary figures for

1. Powder XRD patterns of CaZnOS:Nd<sup>3+</sup>,Mn<sup>2+</sup> series (Fig. S1)
2. ML spectra of CaZnOS:Nd<sup>3+</sup>,Mn<sup>2+</sup> series in a compressive test (Fig. S2)
3. SBR analysis of compression-induced NIR-ML images (Fig. S3)
4. ML spectra of CaZnOS:Nd<sup>3+</sup>,Mn<sup>2+</sup> series in a frictional test (Fig. S4)
5. SBR analysis of friction-induced NIR ML images (Fig.S5)
6. Derivation of the optical bandgap (Fig. S6)
7. PL excitation and emission spectra of CaZnOS:Nd<sup>3+</sup>,Mn<sup>2+</sup> series (Fig. S7)
8. Schematic illustration for compression-induced NIR ML penetration across the biological tissue (Fig. S8)
9. Schematic illustration for friction-induced NIR ML penetration across the biological tissue (Fig. S9)
10. SBR analysis of FIG. 5(a) (Fig. S10)
11. SBR analysis of FIG. 5(d) (Fig. S11)
12. Schematic illustration for bite-induced NIR ML penetration across the human cheek (Fig. S12)

### Supplementary table for

1. Fluorescent decay parameters of CaZnOS:Nd<sup>3+</sup>,Mn<sup>2+</sup> series (Table S1)

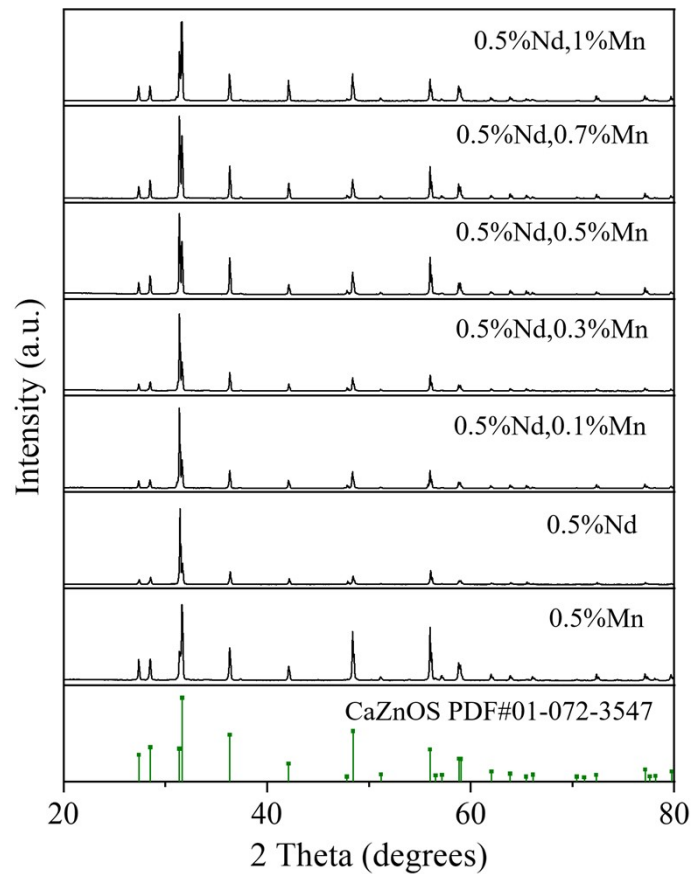

**Fig. S1** Powder XRD patterns of CaZnOS:Nd<sup>3+</sup>,Mn<sup>2+</sup> series with different Nd<sup>3+</sup> and Mn<sup>2+</sup> concentrations. None of impurity lines have been detected. It indicates that the synthesized phosphors are the single phase of CaZnOS.

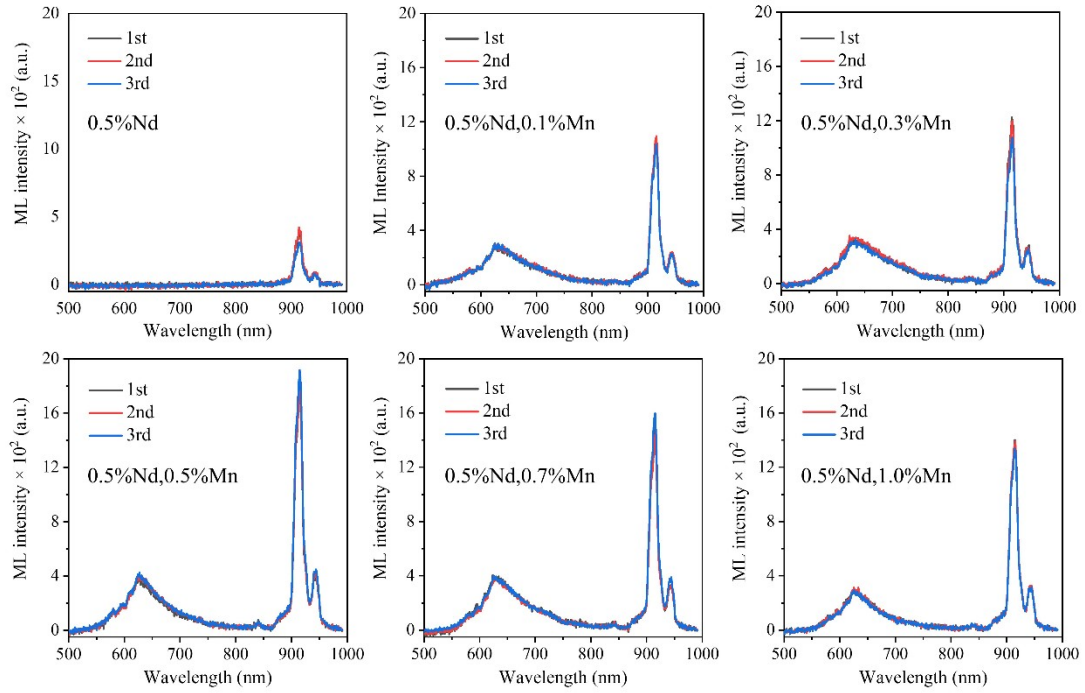

**Fig. S2** ML spectra of CaZnOS:Nd<sup>3+</sup>,Mn<sup>2+</sup> series collected in a compressive test (0–1000 N, 5 mm/min). For each component of the CaZnOS:Nd<sup>3+</sup>,Mn<sup>2+</sup> series, three fresh samples were tested separately for error analysis. The results show high repeatability of the compression-induced ML spectra for the fresh samples.

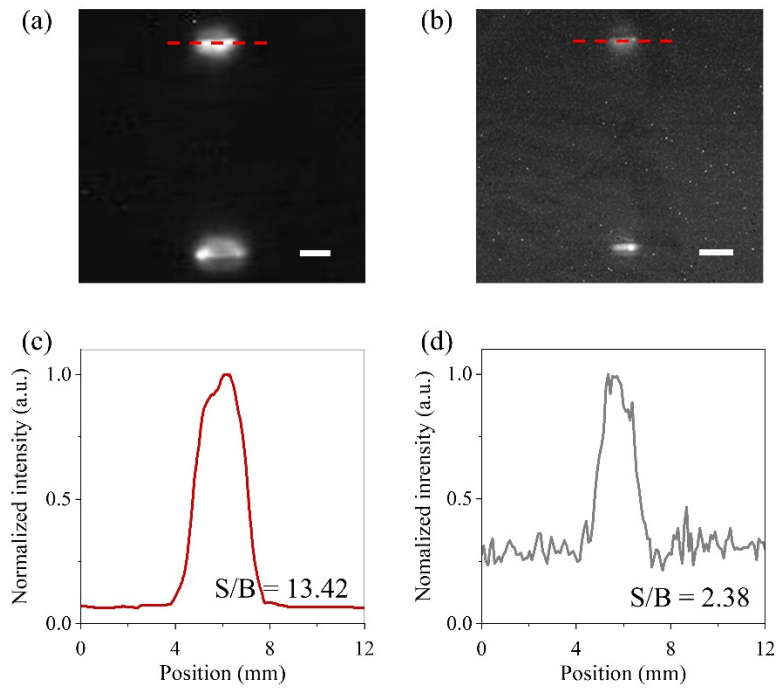

**Fig. S3** Compression-induced NIR-ML images of CaZnOS:0.5%Nd<sup>3+</sup>,0.5%Mn<sup>2+</sup> (a) and CaZnOS:0.5%Nd<sup>3+</sup> (b) with the corresponding SBR analysis shown in (c) and (d). Scale bars: 3 mm.

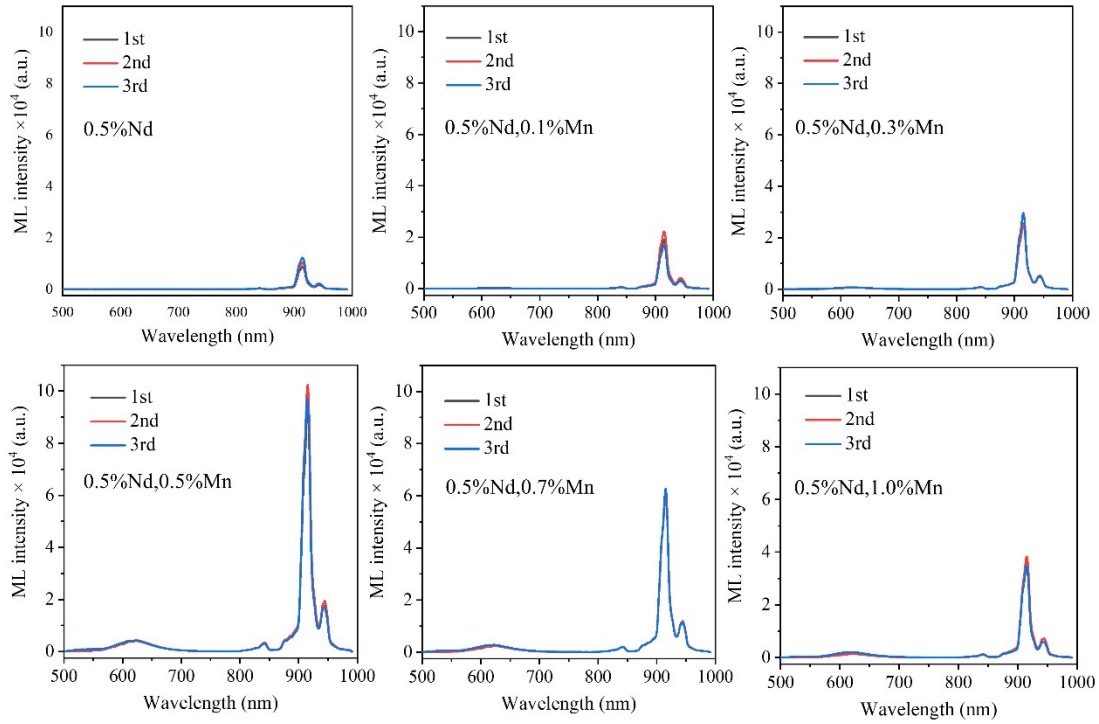

**Fig. S4** ML spectra of CaZnOS:Nd<sup>3+</sup>,Mn<sup>2+</sup> series collected in a frictional test (5 N, 100 r/min). For each component of the CaZnOS:Nd<sup>3+</sup>,Mn<sup>2+</sup> series, three fresh samples were tested separately for error analysis. The results show high repeatability of the friction-induced ML spectra for the fresh samples.

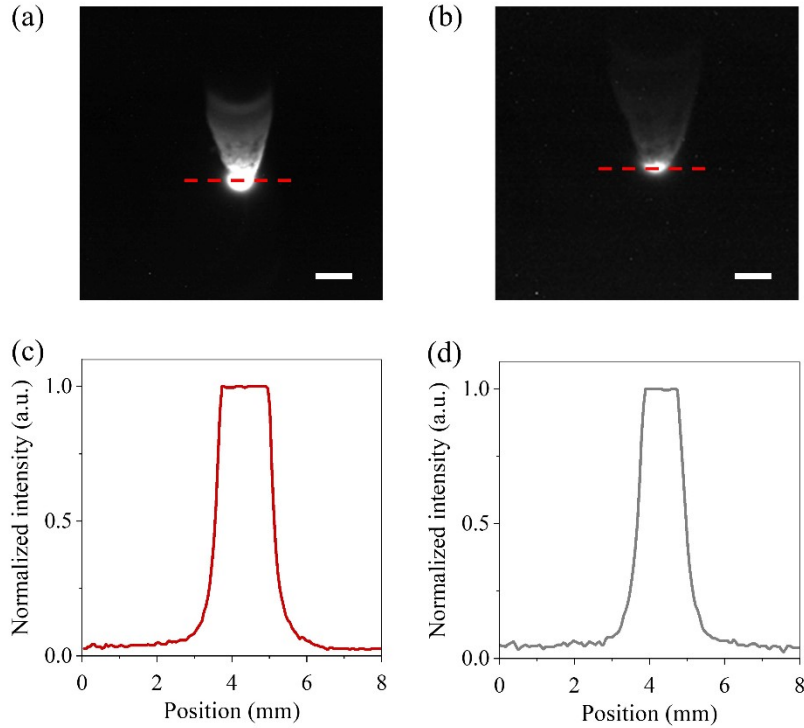

**Fig. S5** Friction-induced NIR ML images of  $\text{CaZnOS:0.5\%Nd}^{3+},0.5\%\text{Mn}^{2+}$  (a) and  $\text{CaZnOS:0.5\%Nd}^{3+}$  (b) with the corresponding SBR analysis shown in (c) and (d). Scale bars: 3 mm. It should be noted that the NIR ML intensity exceeds the threshold of the NIR camera used, resulting in the platform in (c) and (d), respectively. Although it is difficult to directly compare the NIR ML intensity due to the platform, it can be inferred that the NIR ML of  $\text{CaZnOS:0.5\%Nd}^{3+},\text{Mn}^{2+}$  should have higher trend based on the wider platform in (c) relative to (d). On the other hand, it can be clearly observed that the background noise of the NIR ML images of  $\text{CaZnOS:0.5\%Nd}^{3+},0.5\%\text{Mn}^{2+}$  (c) is lower than that of  $\text{CaZnOS:0.5\%Nd}^{3+}$  (d). Therefore, we can reasonably infer that the use of  $\text{CaZnOS:0.5\%Nd}^{3+},0.5\%\text{Mn}^{2+}$  in this experiment effectively improves the SBR of the NIR ML images.

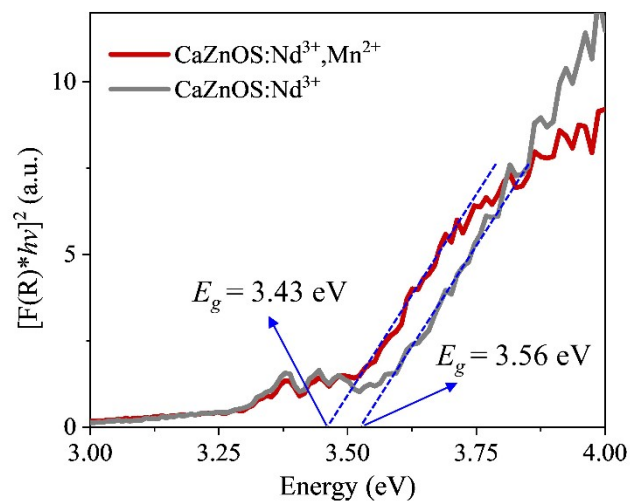

**Fig. S6** Derivation of the optical bandgap of  $\text{CaZnOS:0.5\%Nd}^{3+}, 0.5\%\text{Mn}^{2+}$ . The results show that  $\text{Mn}^{2+}$  doping reduces the bandgap from 3.56 eV ( $\text{CaZnOS:0.5\%Nd}^{3+}$ ) to 3.43 eV ( $\text{CaZnOS:0.5\%Nd}^{3+}, 0.5\%\text{Mn}^{2+}$ ).



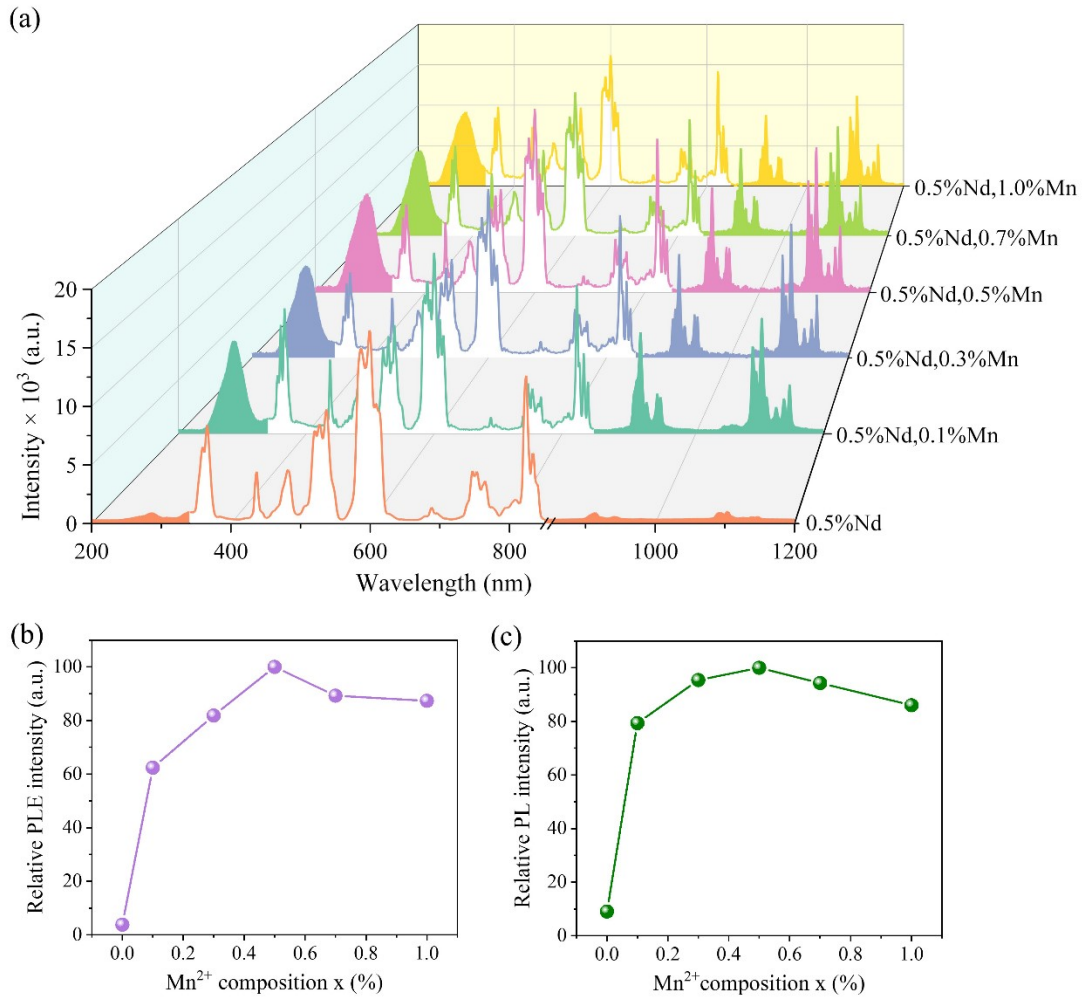

**Fig. S7** (a) PL excitation (PLE) and emission spectra of  $\text{CaZnOS:Nd}^{3+}, \text{Mn}^{2+}$  series ( $\lambda_{\text{ex}} = 277 \text{ nm}$ ,  $\lambda_{\text{em}} = 914 \text{ nm}$ ). (b) and (c) Relative PLE intensity of host and NIR PL intensity of  $\text{Nd}^{3+}$  as a function of  $\text{Mn}^{2+}$  concentration, respectively. The results indicate that the PLE band of the host (marked with colored shading) is significantly increased by  $\text{Mn}^{2+}$  doping, resulting in the enhanced NIR emission from  $\text{Nd}^{3+}$ . Furthermore, the optimal  $\text{Mn}^{2+}$  concentration for increasing the NIR PL of  $\text{Nd}^{3+}$  is 0.5 mol%, which is the same as the optimal concentration for increasing the NIR ML of  $\text{Nd}^{3+}$  (Figures 2b and 3b). It suggests that the enhancement of PL and ML should go through the same pathway of energy transfer.

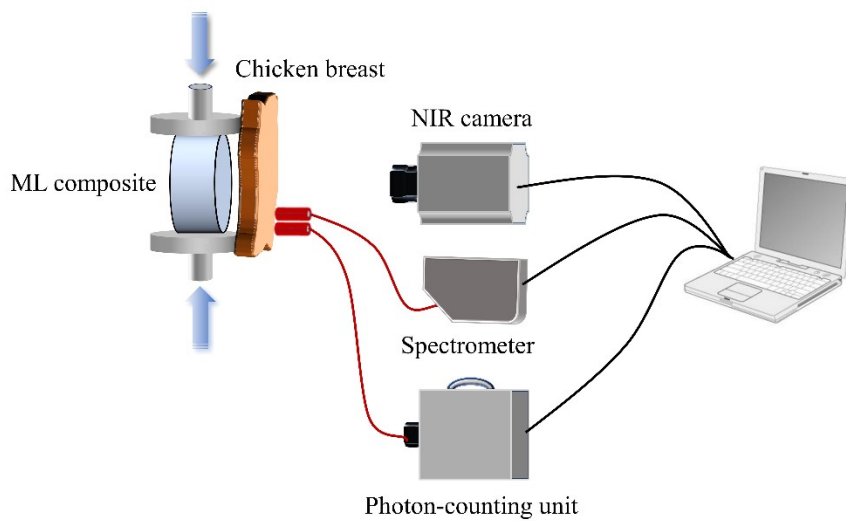

**Fig. S8** Schematic illustration of the devices for mechanical application and photodetection of compression-induced NIR ML penetration across biological tissues.

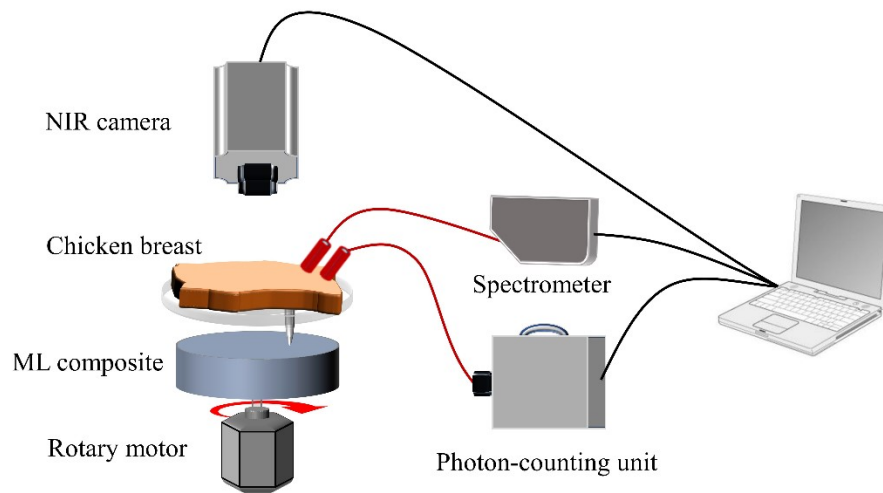

**Fig. S9** Schematic illustration of the devices for mechanical application and photodetection of friction-induced NIR ML penetration across biological tissues.

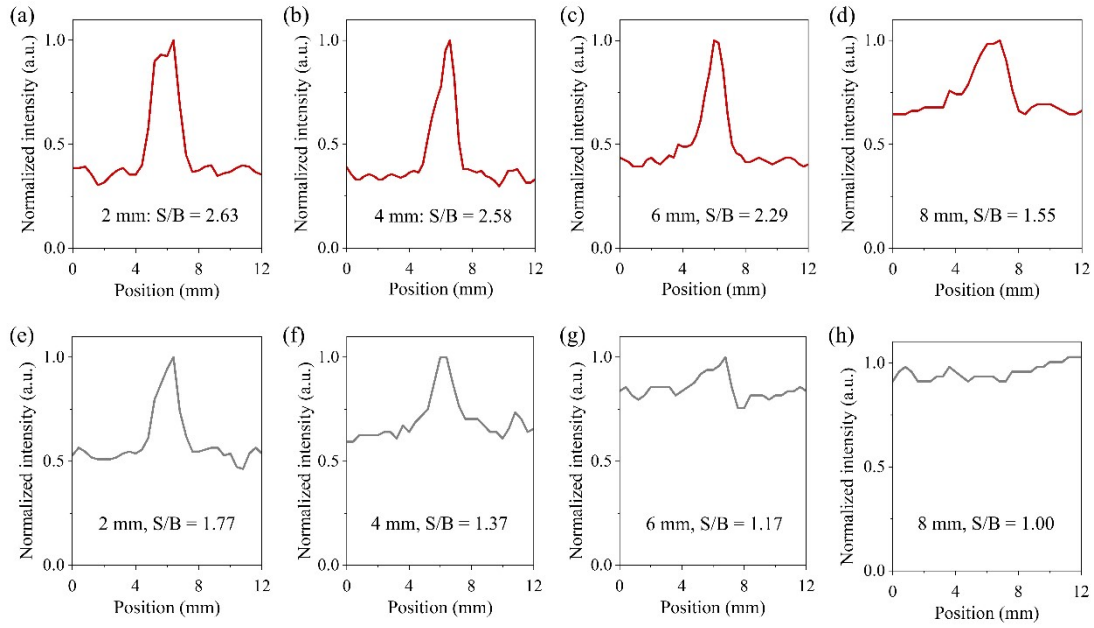

**Fig. S10** SBR analysis of Fig. 5(a) in the main text. (a-d) for a  $\text{CaZnOS:0.5\%Nd}^{3+},0.5\%\text{Mn}^{2+}$  composite covered by chicken breasts with thicknesses of 2, 4, 6 and 8 mm, respectively. (e-h) for a  $\text{CaZnOS:0.5\%Nd}^{3+}$  composite covered by chicken breasts with thicknesses of 2, 4, 6 and 8 mm, respectively. The results show that the SBR values of NIR ML images obtained using  $\text{CaZnOS:0.5\%Nd}^{3+},0.5\%\text{Mn}^{2+}$  are consistently higher than those using  $\text{CaZnOS:0.5\%Nd}^{3+}$  when covering the same thickness of chicken tissues.

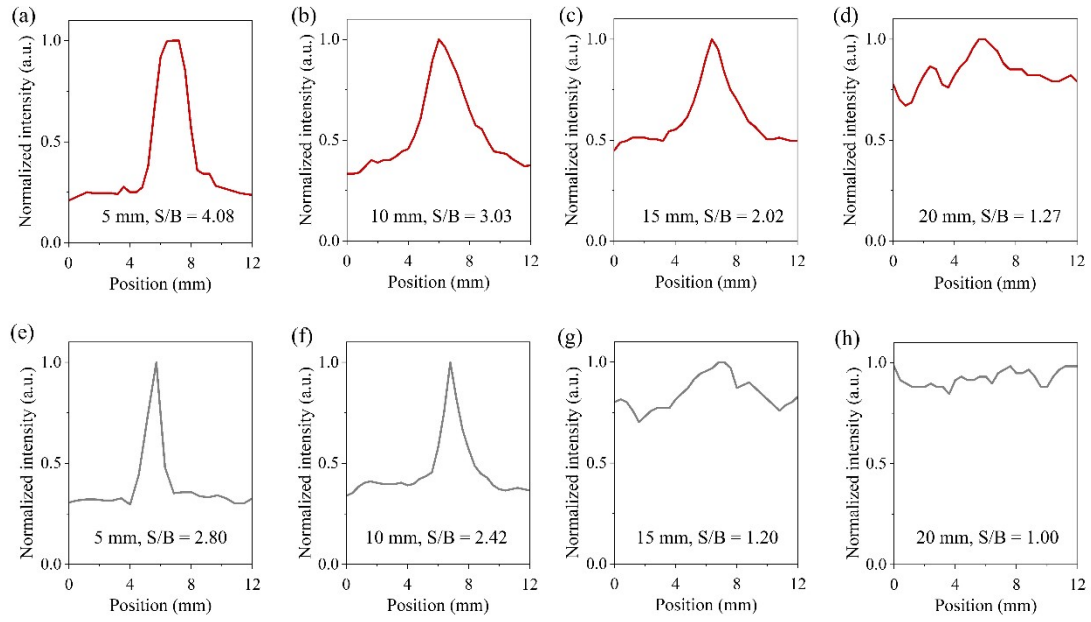

**Fig. S11** SBR analysis of Fig. 5(d) in the main text. (a-d) for a  $\text{CaZnOS:0.5\%Nd}^{3+},0.5\%\text{Mn}^{2+}$  composite covered by chicken breasts with thicknesses of 5, 10, 15 and 20 mm, respectively. (e-h) for a  $\text{CaZnOS:0.5\%Nd}^{3+}$  composite covered by chicken breast with thicknesses of 5, 10, 15 and 20 mm, respectively. The results show that the SBR values of NIR ML images obtained using  $\text{CaZnOS:0.5\%Nd}^{3+},0.5\%\text{Mn}^{2+}$  are consistently higher than those using  $\text{CaZnOS:0.5\%Nd}^{3+}$  when covering the same thickness of chicken tissues.

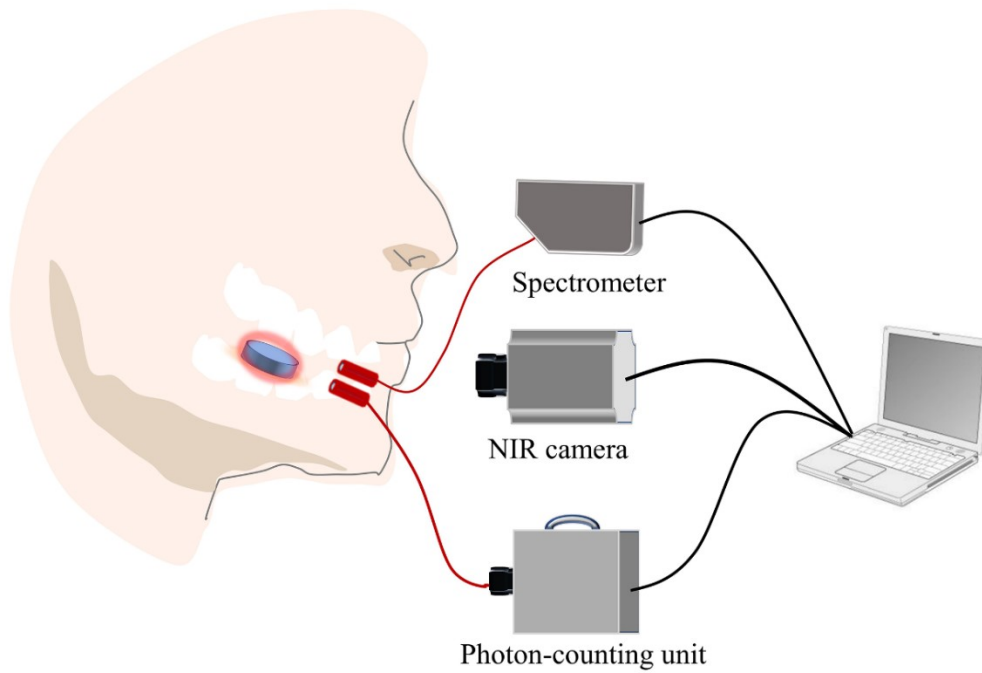

**Fig. S12** Schematic illustration of the bite scene and photodetection setup for bite-induced NIR ML penetration across human cheek. Notably, the probes of the spectrometer and photon-counting unit are placed on the outside of the cheek.

**Table S1.** Fluorescent decay parameters of CaZnOS:Nd<sup>3+</sup>,Mn<sup>2+</sup> series.

| Component      | Wavelength (nm) | $A_1$  | $\tau_1$ (ms) | $A_2$ | $\tau_2$ (ms) | $R^2$  | $\tau^*$ (ms) |
|----------------|-----------------|--------|---------------|-------|---------------|--------|---------------|
| 0.5%Nd         | 914             | 4628.1 | 0.213         | 268.1 | 1.978         | 0.9967 | 0.829         |
| 0.5%Nd,0.1% Mn | 914             | 3502.0 | 0.293         | 681.1 | 1.877         | 0.9951 | 1.108         |
| 0.5%Nd,0.3%Mn  | 914             | 3252.1 | 0.316         | 547.8 | 2.203         | 0.9926 | 1.319         |
| 0.5%Nd,0.5%Mn  | 914             | 2483.4 | 0.302         | 647.0 | 1.928         | 0.9890 | 1.369         |
| 0.5%Nd,0.7%Mn  | 914             | 2944.4 | 0.332         | 667.5 | 2.094         | 0.9923 | 1.335         |
| 0.5%Nd,1.0%Mn  | 914             | 2744.6 | 0.307         | 572.2 | 2.050         | 0.9889 | 1.321         |
| 0.5%Mn         | 605             | 0.079  | 0.166         | 0.915 | 2.597         | 0.9984 | 2.584         |
| 0.5%Mn,0.5%Nd  | 605             | 0.256  | 0.561         | 0.673 | 2.236         | 0.9983 | 2.073         |

The experimental data was fitted according to the formula:  $I(t) = A_1 \exp(-t/\tau_1) + A_2 \exp(-t/\tau_2)$ , where  $I(t)$  is the luminescent intensity,  $t$  is time,  $A_1$  and  $A_2$  are the different fitting values,  $\tau_1$  and  $\tau_2$  are the decay time for the exponential components.  $\tau^*$  is the average decay time, which is calculated by the quadratic formula:  $\tau^* = (A_1\tau_1^2 + A_2\tau_2^2)/(A_1\tau_1 + A_2\tau_2)$ .
